# Supplementary material for: Systematic Screening of Drosophila Deficiency Mutations for Embryonic Phenotypes and Orphan Receptor Ligands
Source: PLoS One. 2010 Aug 19;5(8):e12288. doi: 10.1371/journal.pone.0012288 (PMC2924397; doi:10.1371/journal.pone.0012288)
Supplement: Table S2 — The ‘mild’ subset of the deficiency kit (0.05 MB XLS) [file pone.0012288.s002.xls]

## Sheet: Sheet1
cytology	BL#	name	phenotype
1B14;1E1	9053	Df(1)ED6443	mild
1D2;1E3	8030	Df(1)ED404	mild
1E3;2B12	933	Df(1)A94	mild
2C2-4;2E2-3	2986	Df(1)Pgd35	mild
3C11;3E4	939	Df(1)dm75e19	mild
3E8;4F11-12	941	Df(1)HC244	mild
4C15-16;5A1-2	944	Df(1)JC70	mild
4F10;5A2	7708	Df(1)Exel6234	mild
5A2;5A6	7709	Df(1)Exel6235	mild
5A8-9;5C5-6	945	Df(1)C149	mild
5C2;5D5-6	946	Df(1)N73	mild
5F3;6D3	9212	Df(1)ED6849	mild
6C12;6D8	9625	Df(1)ED6878	mild
7B2-4;7C3-4	3221	Df(1)ct4b1	mild
8B6;8C13	8033	Df(1)ED6957	mild
8C10;8E1-2	3689	Df(1)18.1.15	mild
8E;9C-D	952	Df(1)C52	mild
9F13;10A5	6219	Df(1)v-L1	mild
11B15;11E8	8898	Df(1)ED7170	mild
11D-E;12A1-2	967	Df(1)C246	mild
12F5-6;13A9-B1	1039	Df(1)RK4	mild
13B1;13C3	8035	Df(1)ED7294	mild
13B5-6;13E1-2	7339	In(1)AC2[L]AB[R]	mild
13F1;14B1	3347	Df(1)sd72b	mild
14A;15D	2099	Df(1)XR38	mild?
14B8;14C1	125	Df(1)4b18	mild
14B13;15A9	3217	Tp(1;2)r[+]75c	mild?
15A1;15E3	8954	Df(1)ED7374	mild
16C1;16F6	25737	Df(1)BSC647	mild
18A2;18A2	7754	Df(1)Exel6253	mild
18A3;18C2	8951	Df(1)ED7441	mild
18B7;18C8	7768	Df(1)Exel7468	mild
18C8;18D3	23171	Df(1)BSC275	mild
19F3;20A4	25422	Df(1)BSC588	mild
20A1;20C1	7723	Df(1)Exel6255	mild
21A1;21B7-8	3638	Df(2L)net-PMF	mild
21B7-C1;21C2-3	6283	Df(2L)BSC4	mild
21B8;21C4	8672	Df(2L)BSC106	mild
21C3-4;21C6-8	6608	Df(2L)BSC16	mild
22D2-3;22F1-2	7144	Df(2L)BSC37	mild
22E4-F2;22F3-23A1	6648	Df(2L)dpp[d14]	mild
22F3-4;23C3-5	90	Df(2L)C144	mild?
23C1-2;23E1-2	1567	Df(2L)JS17	mild
23C5-D1;23E2	6875	Df(2L)BSC28	mild
23E5;23F4-5	6965	Df(2L)BSC31	mild
24F4;25A7	9270	Df(2L)ED250	mild
25C4;25C8	8674	Df(2L)BSC109	mild
25C8;25D5	7497	Df(2L)Exel6011	mild
25E5;25F3	9560	Df(2L)BSC169	mild
25F2;25F5	7499	Df(2L)Exel6013	mild
25F5;26B5	9272	Df(2L)ED347	mild
26B5;26B11-C1	7501	Df(2L)Exel6015	mild
26C2;26C3	7800	Df(2L)Exel9038	mild
27C2-3;27C4-5	5420	Df(2L)Dwee1-W05	mild
27C4;27D4	7802	Df(2L)Exel7029	mild
27F2;28A3	7804	Df(2L)Exel7031	mild
27F4;28C4	9274	Df(2L)ED499	mild
28DE;28DE	140	Df(2L)Trf-C6R31	mild
28F5;29B1	8836	Df(2L)BSC111	mild
29C4;29D5	7809	Df(2L)Exel7038	mild
29D3;29E2	9643	Df(2L)BSC215	mild
30C3-5;30F1	6478	Df(2L)BSC17	mild
31B1;31D9	9503	Df(2L)BSC143	mild
31E3;31F5	7999	Df(2L)Exel7048	mild
31F4;32A5	8043	Df(2L)ED746	mild
32D1;32D4-E1	7143	Df(2L)BSC36	mild
32D1;32F1-3	5869	Df(2L)FCK-20	mild
34B4;34C4	9594	Df(2L)BSC159	mild
34B12-C1;35B10-C1	3138	Df(2L)b87e25	mild
35B4;35D4	6244	Df(2L)TE35BC-24	mild
35D6;35E2	7521	Df(2L)Exel6038	mild
35E1;35F1	23678	Df(2L)BSC293	mild
35F12;36A10	24113	Df(2L)ED1102	mild?
36A1;36A12	7833	Df(2L)Exel7066	mild
36B1;36C9	7835	Df(2L)Exel8036	mild
36C8;36E3	9507	Df(2L)BSC148	mild
36E3;36F2	23156	Df(2L)BSC256	mild
38A3;38A7	7527	Df(2L)Exel6045	mild
38A7;38B2	7850	Df(2L)Exel7077	mild
38D1;38F5	9175	Df(2L)ED1317	mild
38F3;39A2	7853	Df(2L)Exel7080	mild
39A2;39B4	7529	Df(2L)Exel6047	mild
39B4;39D1	7530	Df(2L)6048	mild
39E3;40A5	9340	Df(2L)ED1466	mild
39E7;40D3	7531	Df(2L)Exel6049	mild
40A5;40E5	9510	Df(2L)BSC151	mild
h35;h38L	4959	Df(2L)C'	mild
h42-h43;42A2-3	749	In(2R)bw[VDe2L]Cy[R]	mild
h46;41C1-6	8475	Df(2R)Nipped-D	mild
42A1-2;42E6-F1	1007	Df(2R)nap9	mild
42F3;43E12	7858	Df(2R)Exel7092	mild
44E2;45A1	26501	Df(2R)BSC268	mild
44F10;45D9-E1	3591	Df(2R)Np5	mild
45A6-7;45E2-3	4966	Df(2R)w45-30n	mild
45D3-4;45F2-6	6917	Df(2R)BSC29	mild
45F6;46B12	9410	Df(2R)BSC132	mild
46E1;46F3	23686	Df(2R)BSC303	mild
46F1;47A9	23666	Df(2R)BSC281	mild
48A3-4;48C6-8	1145	Df(2R)en30	mild
48C5-D1;48D5-E1	7145	Df(2R)BSC39	mild
49E6;49F1	7544	Df(2R)Exel6062	mild
49F10;50A1	7872	Df(2R)Exel7124	mild
50D4;50E4	7875	Df(2R)Exel7130	mild
50E4;50E6	7876	Df(2R)Exel7131	mild
51E2;51E11	7879	Df(2R)Exel7135	mild
52F5-9;52F10-53A1	3520	Df(2R)Jp8	mild
52F6;53C3	7545	Df(2R)Exel6063	mild
53A4;53C4	7886	Df(2R)Exel7142	mild
53C11;53D11	7546	Df(2R)Exel6064	mild
54B2;54B17	9596	Df(2R)BSC161	mild
54B16;54C3	24379	Df(2R)BSC355	mild
54C8-D1;54E2-7	7441	Df(2R)BSC45	mild
54D1-2;54E5-7	6779	Df(2R)14H10Y-53	mild
54E1;54E9	7891	Df(2R)Exel7150	mild
54E8;54F3-4	6778	Df(2R)02B10W-08	mild
55A1;55B7	24987	Df(2R)BSC483	mild
55B9;55C1	7893	Df(2R)Exel7153	mild
55D2-E1;56B2	6146	Df(2R)PC66	mild
56A1;56B5	7550	Df(2R)Exel6068	mild
56F11;56F16	7896	Df(2R)Exel7162	mild
56F12-14;57A4	6609	Df(2R)BSC19	mild
57F2;58A1	5764	Df(2R)XE-2900	mild
57F6;57F10	8942	Df(2R)ED3923	mild
59B;59D8-E1	3909	Df(2R)59AD	mild
59C3;59D2	7906	Df(2R)Exel7177	mild
59D5;59D10	7908	Df(2R)Exel7178	mild
60B8;60C4	24380	Df(2R)BSC356	mild
60B12;60C4	7912	Df(2R)Exel7184	mild
60C4;60C7	7561	Df(2R)Exel6082	mild
60C5-6;60D9-10	2604	Df(2R)Px2	mild
60E2-3;60E11-12	2471	Df(2R)M60E	mild
61A;61D3	2577	Df(3L)emc-E12	mild
61C5-8;62A8	439	Df(3L)Ar14-8	mild
62A2;62A7	7566	Df(3L)Exel6087	mild
62B4-7;62D5-E5	2400	Df(3L)R-G7	mild
62E8;63B5-6	6755	Df((3L)BSC23	mild
63C2;63F7	3649	Df(3L)HR119	mild
64B5;64B11	7580	Df(3L)Exel6101	mild
64B9;64C13	8061	Df(3L)ED210	mild
65A2;65E1	4393	Df(3L)XD198	mild
65D4-5;65E4-6	6867	Df(3L)BSC27	mild
65E10-F1;65F2-6	6964	Df(3L)BSC33	mild
65F7;66A4	7929	Df(3L)Exel8104	mild
66B8-9;66C9-10	1541	Df(3L)66C-G28	mild
66B12-C1;66D2-4	6460	Df(3L)BSC13	mild
66D12;66E6	8702	Df(3L)ED4414	mild
66E1-6;66F1-6	4500	Df(3L)Scf-R6	mild
67B1;67B5	8970	Df(3L)BSC118	mild
67B7;67C5	24415	Df(3L)BSC391	mild
67B10;67C5	7593	Df(3L)Exel6144	mild
67C2-4;67C8-10	7442	Df(3L)BSC46	mild
67C7;67D10	26525	Df(3L)BSC673	mild
67E3-7;68A2-6	6471	Df(3L)BSC14	mild
69A4-5;69D4-6	5492	Df(3L)eyg[C1]	mild
69F6-70A1;70A1-2	6457	Df(3L)BSC12	mild
71F1-4;72D1-10	3640	Df(3L)brm11	mild
74B2;74D2	7611	Df(3L)Exel6132	mild
75B8;75F1	2990	Df(3L)Cat	mild
75F2;76A1	8082	Df(3L)ED4782	mild
75F10-11;76A1-5	6754	Df(3L)fz2	mild
76A7-B1;76B4-5	6646	Df(3L)BSC20	mild
77A1;77D1	2052	Df(3L)rdgC-co2	mild
78C5-6;78E3-79A1	4430	Df(3L)Pc-2q	mild
78D5;79A2	8101	Df(3L)ED4978	mild
79A3;79B3	9700	Df(3L)BSC223	mild
79B2;79D1	23149	Df(3L)BSC249	mild
79C1-3;79E3-8	4506	Df(3L)Ten-m-AL29	mild
79D3-E1;79F3-6	5951	Df(3L)HD1	mild
79E5-F1;80A2-3	6649	Df(3L)BSC21	mild
79C2;80A4	8089	Df(3L)ED230	mild
80A4;80C2	8102	Df(3L)ED5017	mild
81F3-6;82F5-7	1518	Df(3R)ME15	mild
82F3-4;82F10-11	4787	Df(3R)3-4	mild
82F8-10;83A1-3	5694	Df(3R)e1025-14	mild
82F8;83A4	8965	Df(3R)ED5156	mild
83B4;83B6	8103	Df(3R)ED5177	mild
83B7-C1;83C6-D1	7443	Df(3R)BSC47	mild
83C1-2;83D4-5	1990	Df(3R)Tpl10	mild
83E5;83F4	9620	Df(3R)BSC393	mild
84C4;84E11	9201	Df(3R)ED5221	mild
84E6;85A5	8682	Df(3R)ED5230	mild
85C3;85C11	7630	Df(3R)Exel6151	mild
85C11;85D2	7631	Df(3R)Exel6152	mild
85D1;85D11	9204	Df(3R)ED5339	mild
85F1-2;86C7-8	7080	Df(3R)BSC38	mild
86C7;86D7	7957	Df(3R)Exel7306	mild
86D5;86D7	7958	Df(3R)Exel8152	mild
86E5;86E11	7963	Df(3R)Exel8153	mild
87A1;87B5	7641	Df(3R)Exel6162	mild
87E3;87F6	9089	Df(3R)ED5613	mild
88D1;88D7	7742	Df(3R)Exel6275	mild
88D7;88E1	7652	Df(3R)Exel6173	mild
88E2;88E5	24138	Df(3R)ED10566	mild
88F9-89A1;89B9-10	756	Df(3R)sbd105	mild
91F12;92B3	8922	Df(3R)ED5942	mild
92B3;92F13	4962	Df(3R)H-B79	mild
92E2;92F1	7664	Df(3R)Exel6185	mild
92F7-93A1;93B3-6	7413	Df(3R)BSC43	mild
94F1;95A4	7673	Df(3R)Exel6194	mild
95A1-4;95A8-B1	9497	Df(3R)BSC137	mild
95A4;95B1	7674	Df(3R)Exel6195	mild
99A5-7;95D6-11	2585	Df(3R)mbc-R1	mild
95C12;95D8	7675	Df(3R)Exel6196	mild
95D7-11;95F15	4432	Df(3R)crb-F89-4	mild
95D8;95E5	7676	Df(3R)Exel6197	mild
95E5;95F8	7677	Df(3R)Exel6198	mild
96A2;96A13	7948	Df(3R)Exel7357	mild
96A20;96B4	7679	Df(3R)Exel6200	mild
96B2;96B20	24344	Df(3R)BSC318	mild
96B15;96C2	24998	Df(3R)BSC494	mild
96C2;96C4	7680	Df(3R)Exel6201	mild
96C4;96C5	7994	Df(3R)Exel9056	mild
96D1;96E2	7681	Df(3R)Exel6202	mild
96E2;96E6	7682	Df(3R)Exel6203	mild
97A1;97B2	25016	Df(3R)BSC512	mild
97A6;97D4	25000	Df(3R)BSC496	mild
97E3;98A5	823	Df(3R)D605	mild
98A4;98B5	25002	Df(3R)BSC498	mild
98B6;98D2	24964	Df(3R)BSC460	mild
98C4;98D6	7726	Df(3R)Exel6259	mild
98D6;98E1	7687	Df(3R)Exel6209	mild
98E1;98F5	7688	Df(3R)Exel6210	mild
99C5;99D3	25695	Df(3R)BSC620	mild
100B1;100C1	26847	Df(3R)BSC749	mild
100B5;100C4	27365	Df(3R)BSC793	mild
100B4;100B8	7697	Df(3R)Exel6219	mild
100E1;100F5	24516	Df(3R)ED50003	mild
101F2-102A1;102A3	1082	Df(4)M101-63a	mild?
102A3;102B1	8067	Df(4)ED6366	mild?
102A3;102B8	9422	Df(4)ED6369	mild?
102B6;102C2	9579	Df(4)ED6380	mild?
<102C2;102C2-D2>	7082	Df(4)J2	mild?
102E2;102E10	1197	Df(4)38	mild?
